# Supplementary figures and images for: Transcriptomic analysis reveals potential crosstalk genes and immune relationship between triple-negative breast cancer and depression
Source: PubMed Central journal article supplement — Discov Oncol. 2024 Dec 18;15:762. doi: 10.1007/s12672-024-01562-4 (PMC11655728; doi:10.1007/s12672-024-01562-4), 2024-12-18

Group Normal TNBC

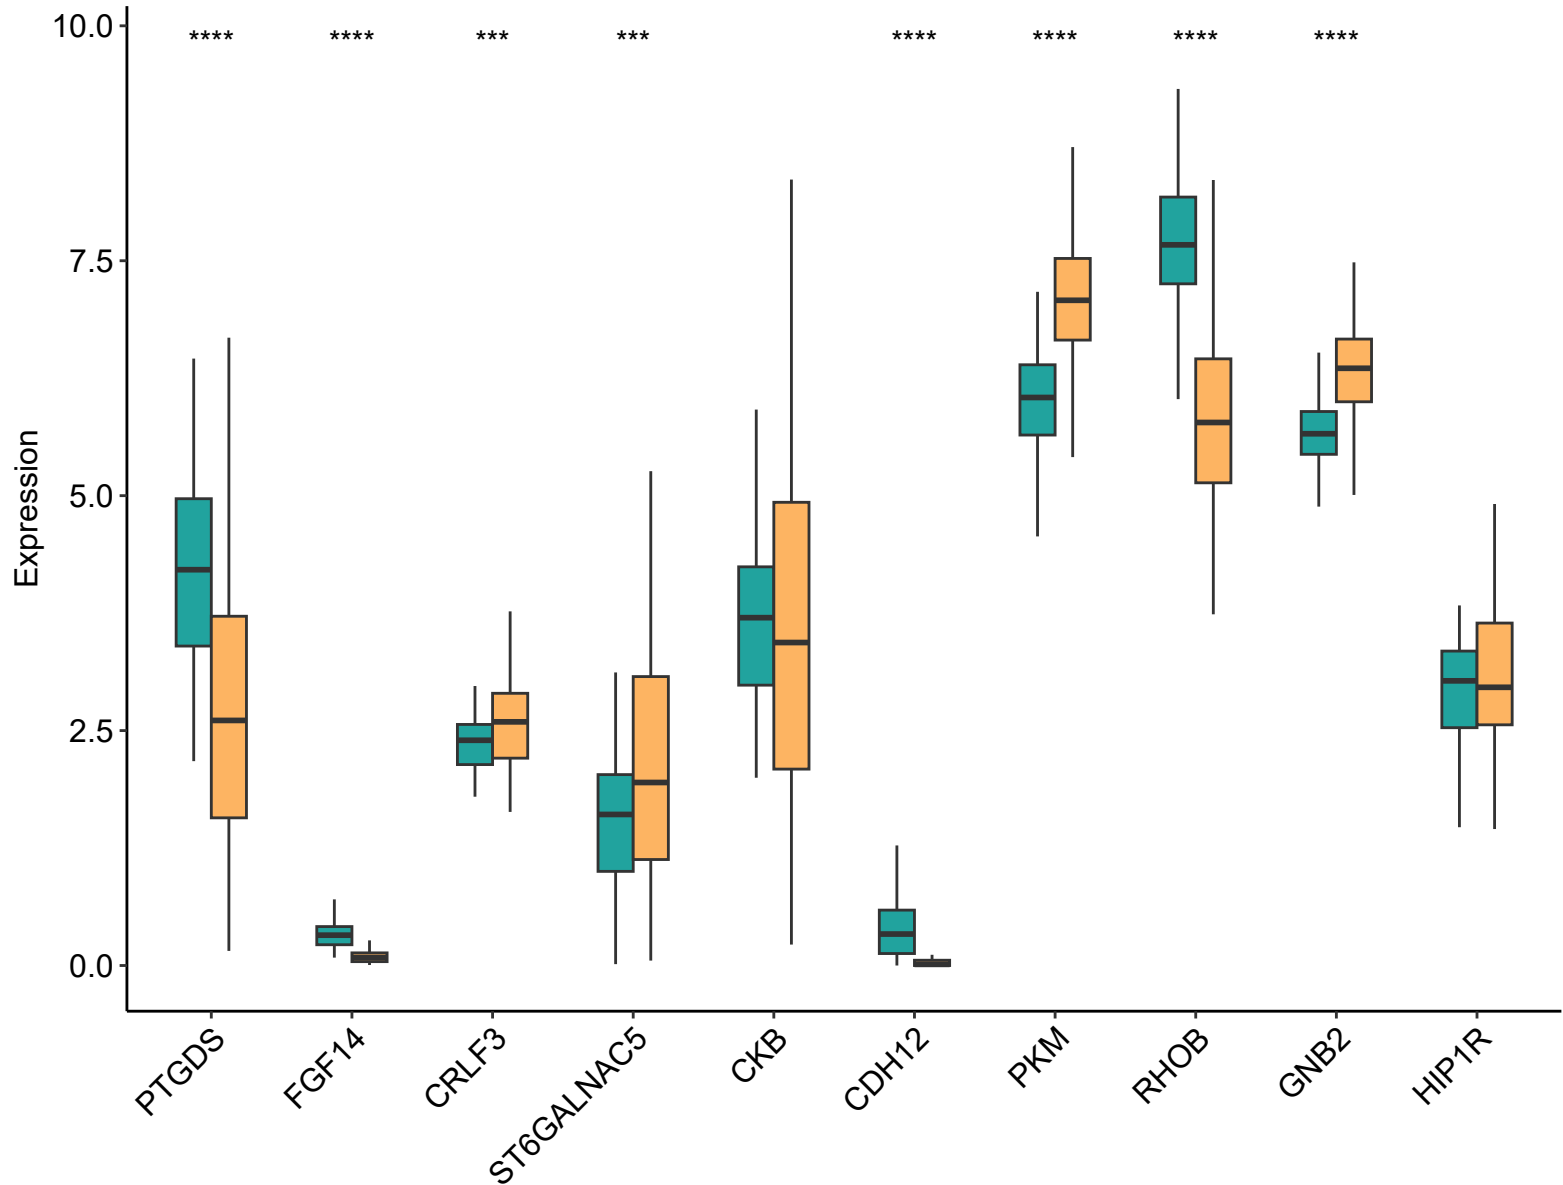

Supplement: 12672_2024_1562_MOESM4_ESM.pdf [file 12672_2024_1562_MOESM4_ESM.pdf]
